# Supplementary material for: Does the Redesign of a Psychiatric Inpatient Unit Change the Treatment Process and Outcomes?
Source: Atypon-hosted journal article supplement (doi:10.1176/appi.ps.004532012), 2013-08-01
Supplement: 804_ds001.pdf [file 804_ds001.pdf]

Table A1: Sample characteristics and clinical status at admission, before and after the redesign<sup>a</sup>

| <b>Characteristic</b>          | <b>Pre<br/>(n=155)</b> | <b>Post<br/>(n=135)</b> | <b>Statistics</b>        |
|--------------------------------|------------------------|-------------------------|--------------------------|
| Male gender, %:                | 44                     | 48                      | $\chi^2(1)=.49, p=.483$  |
| Age, M $\pm$ SD                | 38.8 $\pm$ 11.7        | 38.8 $\pm$ 13.0         | $t(283)=0.02, p=.985$    |
| Employment status, %:          |                        |                         |                          |
| Employed                       | 35                     | 30                      | $\chi^2(3)=4.30, p=.231$ |
| Unemployed, seeking work       | 11                     | 20                      |                          |
| Unemployed, not seeking work   | 43                     | 38                      |                          |
| Other                          | 12                     | 12                      |                          |
| Primary diagnosis, %:          |                        |                         |                          |
| Major depressive disorder      | 40                     | 38                      | $\chi^2(3)=1.84, p=.606$ |
| Bipolar disorders              | 48                     | 50                      |                          |
| Anxiety disorders              | 7                      | 4                       |                          |
| Other                          | 5                      | 8                       |                          |
| Quality of life, M $\pm$ SD    | 19.2 $\pm$ 12.5        | 21.4 $\pm$ 12.2         | $t(260)=-1.44, p=.151$   |
| Global functioning, M $\pm$ SD | 46.9 $\pm$ 10.5        | 54.4 $\pm$ 11.5         | $t(283)=-5.74, p<.001$   |

<sup>a</sup> pairwise n ranged from 262 to 285 due to missing values

Figure A1: Participant perceptions of ward atmosphere, before and after the redesign <sup>a</sup>

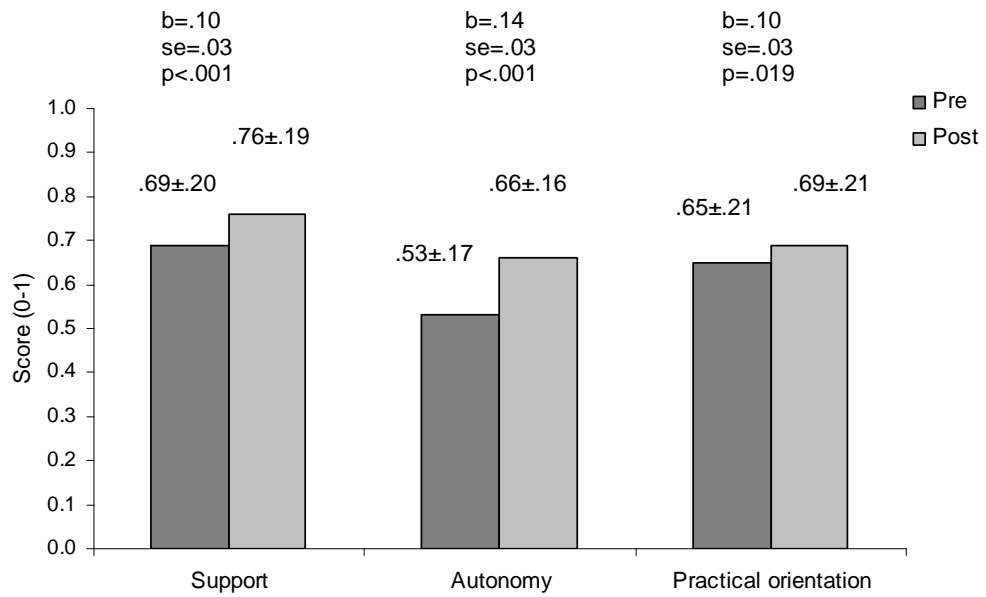

<sup>a</sup> Figure includes M±SD, and results of significance tests (estimated with linear regression using full information maximum likelihood and adjusting for baseline functioning)
